# Supplementary material
Source: Springer Nature journal article supplement (https://www.springermedizin.de/resource/supplementary/13075_2009_2775_MOESM8_ESM.pdf/9692858)

**A**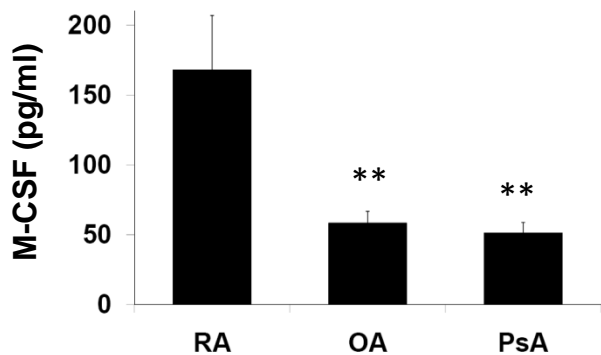**B****Isotype Control**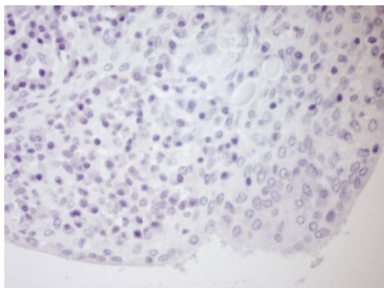**Total c-Fms**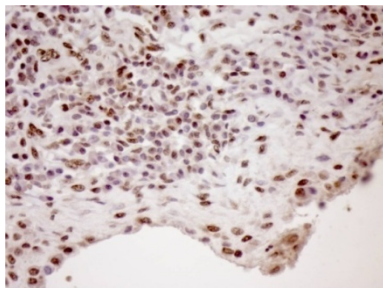**Phospho-c-Fms**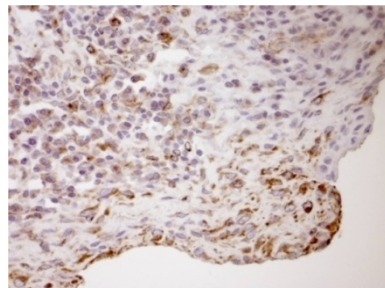

Supplement: MOESM8 [file 9692858]
